# Supplementary material
Source: Springer Nature journal article supplement (https://www.springermedizin.de/resource/supplementary/12936_2013_2936_MOESM16_ESM.pdf/9544554)
Supplement: MOESM16 [file 9544554]

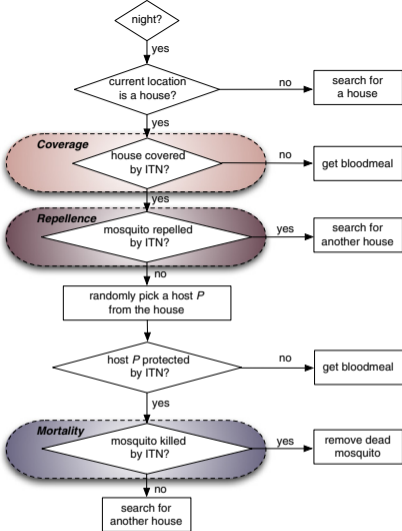

(a) household-level *partial* coverage, *single* chance

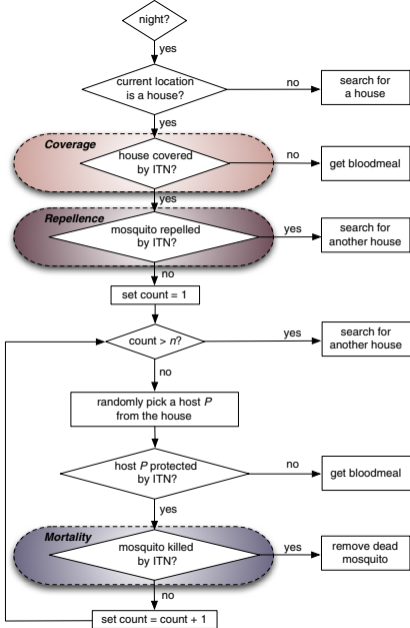

(b) household-level *partial* coverage, *multiple* chances

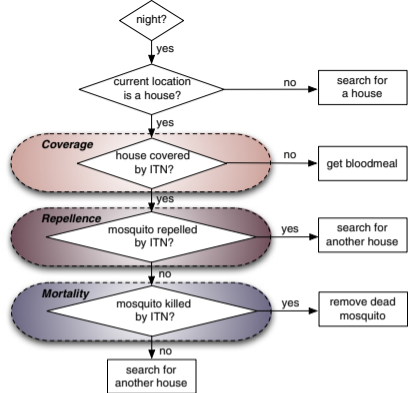

(c) household-level *complete* coverage
